# Supplementary material for: Structural and functional studies on coordination polymers based on 5-tert-butylisophthalic acid and N,N′-bis-(4-pyridylmethyl) piperazine
Source: Royal Society of Chemistry journal article supplement (doi:10.1039/c4ra03569k), 2014-01-01
Supplement: c4ra03569k1.pdf [file c4ra03569k1.pdf]

## Supporting Information

For

**Structural and Functional Studies on coordination polymers based  
on 5-*tert*-butylisophthalic acid and *N,N'*-bis-(4-pyridylmethyl)  
piperazine†**

**Bo Xu\*, Yi-Qiang Sun, Jie Li and Cun-Cheng Li\***

*Key Laboratory of Chemical Sensing & Analysis in Universities of Shandong (University of Jinan), School of Chemistry and Chemical Engineering, University of Jinan, Shandong, Jinan, 250022, China.*

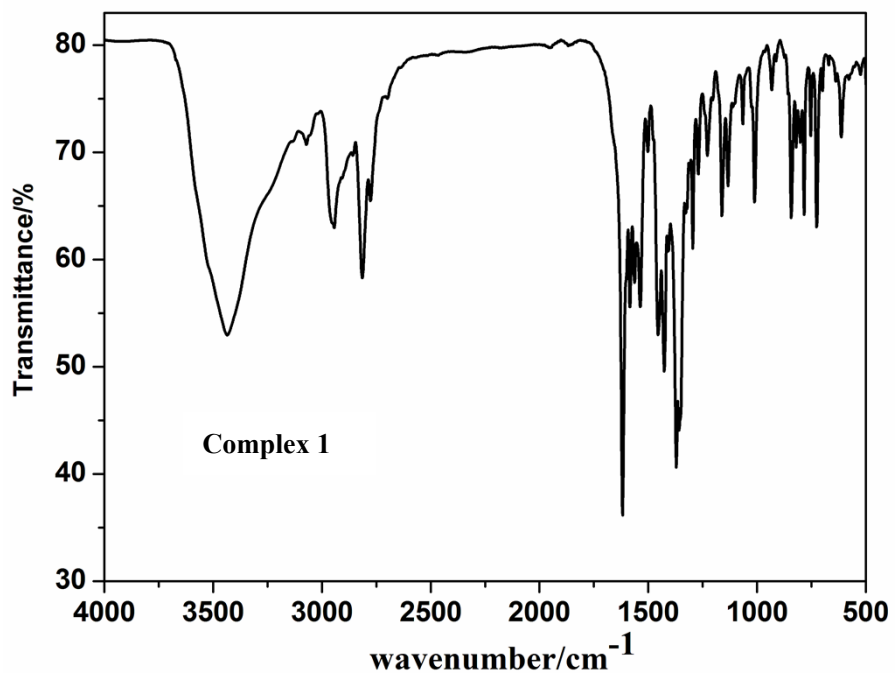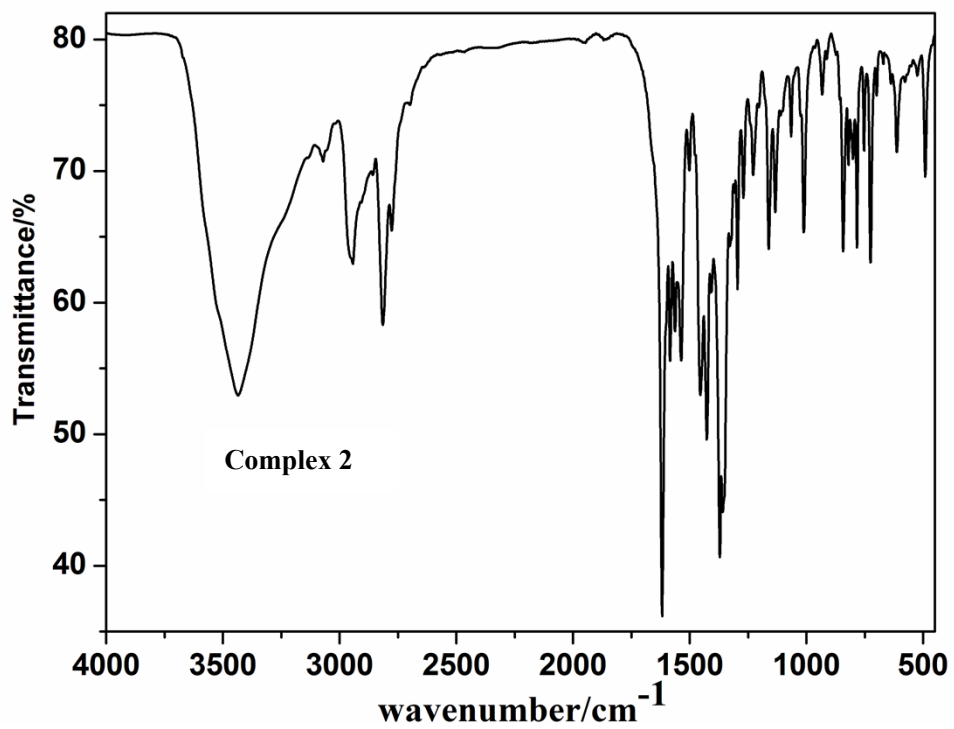

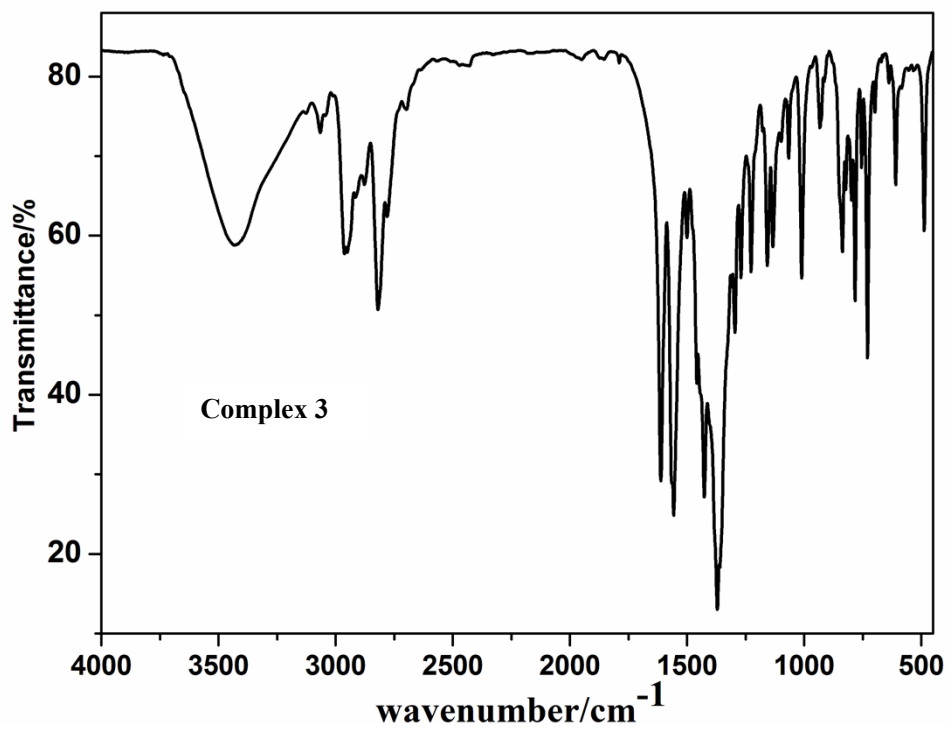

Figure S1 IR spectrum of complex 1-3.

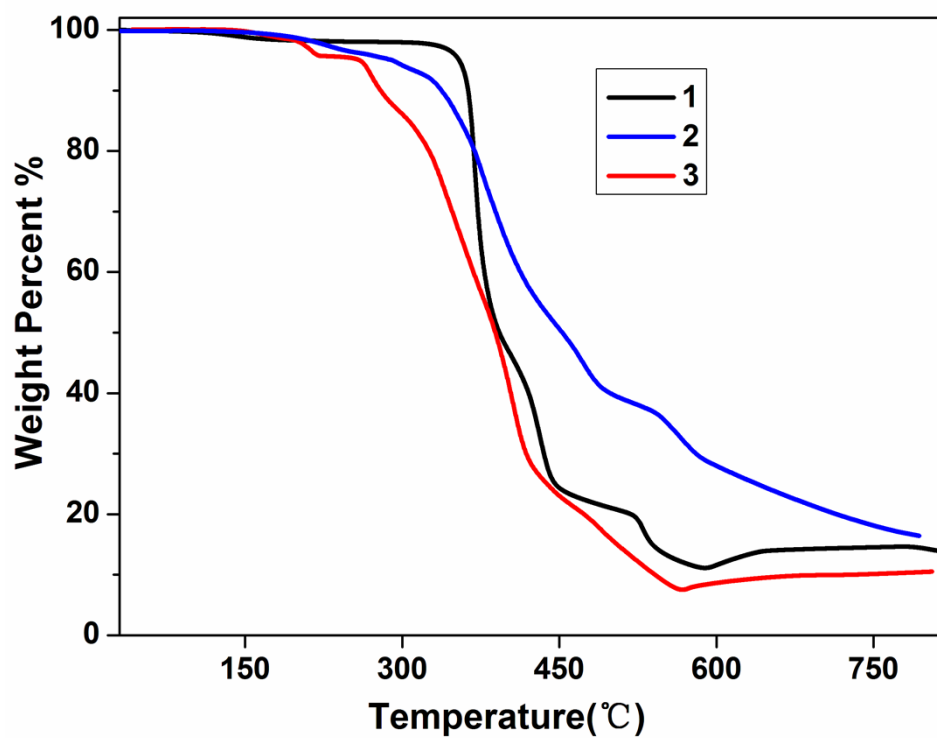

Figure S2 TG curves for 1- 3

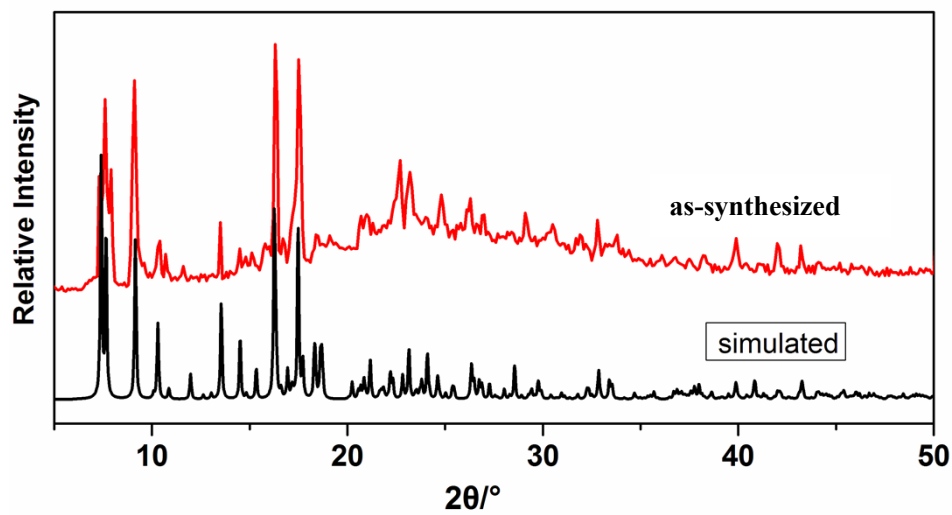

Complex 1

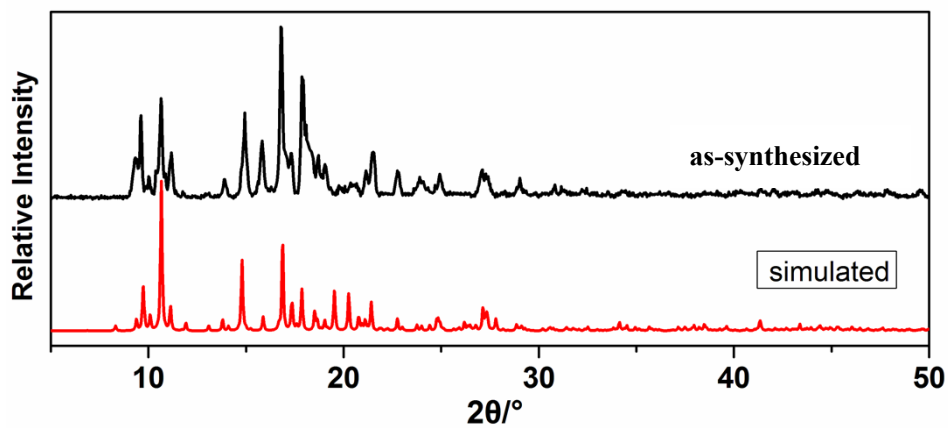

Complex 2

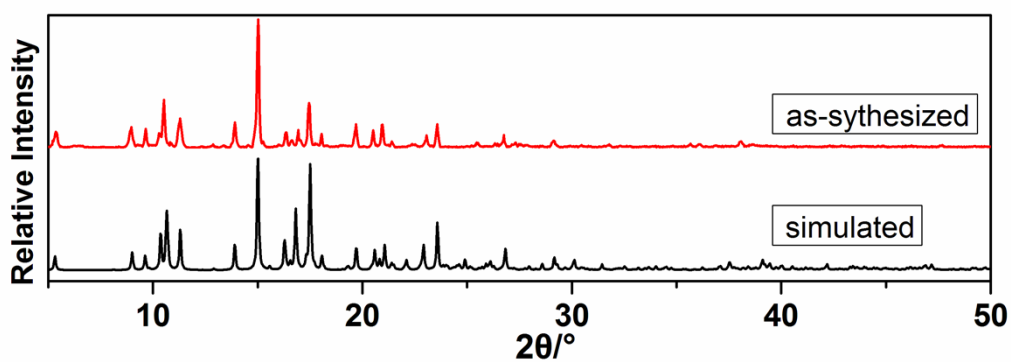

Complex 3

Figure S3 X-Ray powder diffraction patterns of 1- 3.

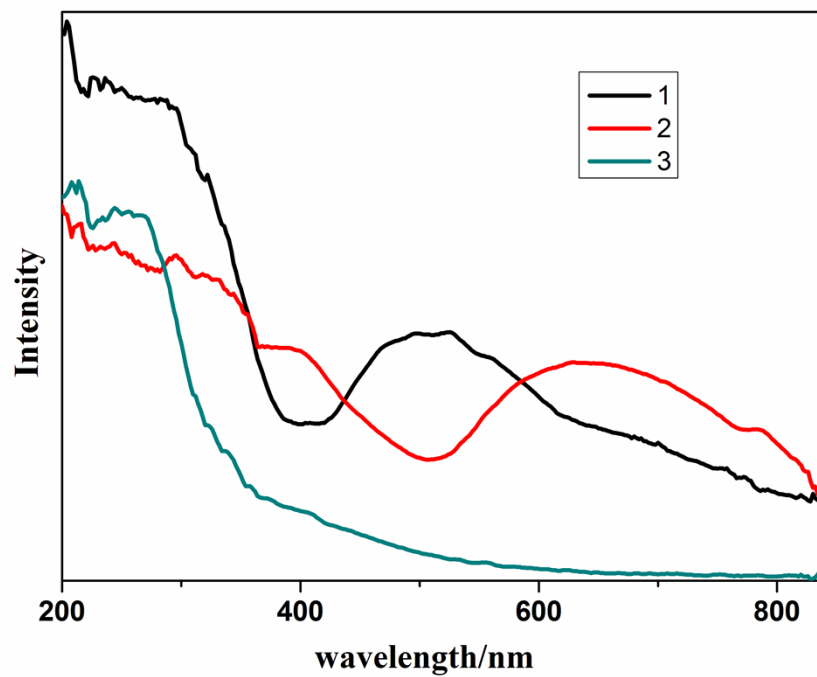

**Figure S4** Solid-state optical absorption spectra of compounds 1- 3.

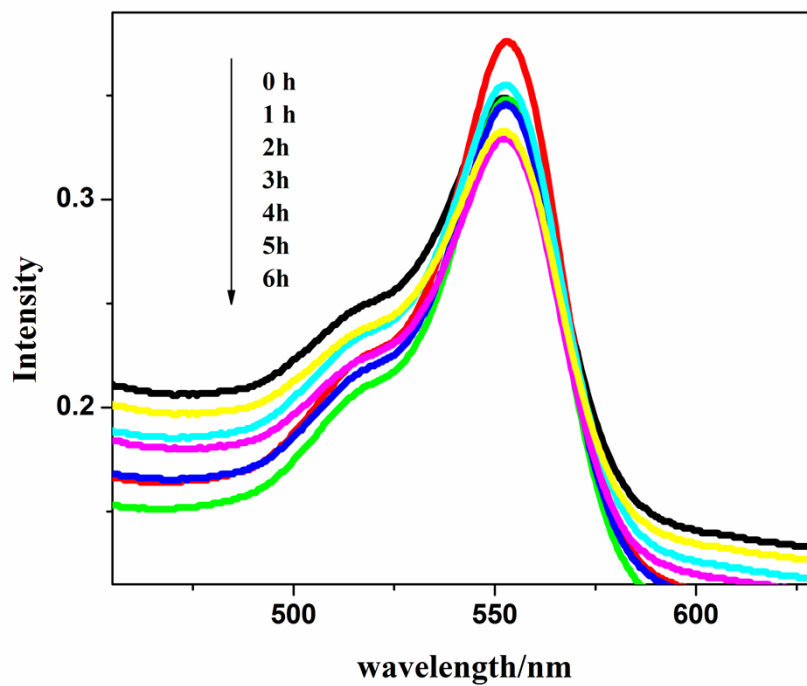

**Figure S5** Absorption spectra of a solution of RhB without compounds 1 and 2 under exposure to visible light.

**Table S1** Selected bond lengths (Å) and angles (°) for complexes

| <b>Complex 1</b>                     |            |                         |            |
|--------------------------------------|------------|-------------------------|------------|
| Co1-O1                               | 2.3327(18) | Co1-O4 <sup>2</sup>     | 2.1239(19) |
| Co1-O3 <sup>1</sup>                  | 2.0858(19) | Co1-N1                  | 2.193(2)   |
| Co1-O2                               | 2.0949(19) | Co1-N2                  | 2.137(2)   |
| O3 <sup>1</sup> -Co1-O1              | 149.77(7)  | O2-Co1-O1               | 63.73(7)   |
| O3 <sup>1</sup> -Co1-O2              | 86.75(8)   | O2-Co1-O4 <sup>2</sup>  | 159.21(7)  |
| O3 <sup>1</sup> -Co1-O4 <sup>2</sup> | 113.93(8)  | O2-Co1-N1               | 97.49(8)   |
| O3 <sup>1</sup> -Co1-N1              | 102.57(9)  | O2-Co1-N2               | 89.26(8)   |
| O3 <sup>1</sup> -Co1-N2              | 92.01(8)   | N2-Co1-O1               | 81.78(7)   |
| N1-Co1-O1                            | 88.40(8)   | N2-Co1-N1               | 164.21(9)  |
| O4 <sup>2</sup> -Co1-O1              | 95.47(7)   | O4 <sup>2</sup> -Co1-N1 | 80.71(8)   |
| <b>Complex 2</b>                     |            |                         |            |
| Ni1-O1W                              | 2.1039(17) | Ni1-O1                  | 2.0484(15) |
| Ni1-O3 <sup>1</sup>                  | 2.0436(15) | Ni1-N5                  | 2.0961(19) |
| Ni1-N1                               | 2.1474(18) | Ni1-N4 <sup>2</sup>     | 2.1258(19) |
| O1W-Ni1-N1                           | 172.39(7)  | O1-Ni1-O1W              | 87.03(6)   |
| O1W-Ni1-N4 <sup>1</sup>              | 89.89(7)   | O1-Ni1-N1               | 86.13(6)   |
| O3 <sup>2</sup> -Ni1-O1W             | 97.94(6)   | O1-Ni1-N5               | 94.50(7)   |
| O3 <sup>2</sup> -Ni1-N1              | 89.21(7)   | O1-Ni1-N4 <sup>1</sup>  | 90.23(7)   |
| O3 <sup>2</sup> -Ni1-O1              | 172.43(6)  | N5-Ni1-O1W              | 89.08(7)   |
| O3 <sup>2</sup> -Ni1-N5              | 91.30(7)   | N5-Ni1-N1               | 88.13(7)   |
| O3 <sup>2</sup> -Ni1-N4 <sup>1</sup> | 84.10(7)   | N5-Ni1-N4 <sup>1</sup>  | 175.11(7)  |
| <b>Complex 3</b>                     |            |                         |            |
| Cd1-N1                               | 2.361(4)   | Cd1-O1                  | 2.260(3)   |
| Cd1-N5                               | 2.346(4)   | Cd1-O3 <sup>1</sup>     | 2.571(3)   |
| Cd1-N4 <sup>2</sup>                  | 2.416(4)   | Cd1-O4 <sup>1</sup>     | 2.331(3)   |
| O4 <sup>1</sup> -Cd1-N4 <sup>2</sup> | 88.87(13)  | N5-Cd1-N1               | 91.03(14)  |
| O4 <sup>1</sup> -Cd1-N5              | 134.90(11) | O1-Cd1-O4 <sup>1</sup>  | 86.65(13)  |
| O4 <sup>1</sup> -Cd1-O3 <sup>1</sup> | 52.73(11)  | O1-Cd1-N4 <sup>2</sup>  | 85.31(13)  |
| O4 <sup>1</sup> -Cd1-N1              | 97.08(13)  | O1-Cd1-N5               | 136.17(12) |
| N4 <sup>2</sup> -Cd1-O3 <sup>1</sup> | 92.94(11)  | O1-Cd1-O3 <sup>1</sup>  | 139.38(11) |
| N5-Cd1-N4 <sup>2</sup>               | 82.84(14)  | O1-Cd1-N1               | 97.67(14)  |
| N1-Cd1-N4 <sup>2</sup>               | 173.47(13) | N1-Cd1-O3 <sup>1</sup>  | 88.56(12)  |

Symmetry transformations used to generate equivalent atoms:

for **1** 1 -X,-Y,-Z; 2 1+X,+Y,+Z

for **2** 1 1-X,1/2+Y,-1/2-Z; 2 -1+X,+Y,+Z

for **3** 1 +X,1+Y,+Z; 2 -1+X,+Y,+Z
